# Supplementary material for: The importance of organizational characteristics for improving outcomes in patients with chronic disease: a systematic review of congestive heart failure
Source: Springer Nature journal article supplement (doi:10.1186/1748-5908-5-66), 2010-08-25
Supplement: Additional file 3 [file 1748-5908-5-66-s3.docx]

**Additional File 3. Detail of analysis for individual CAS characteristics and intervention effectiveness for CHF**

| **CAS Characteristic in intervention** | **0** | **0.5** | **1** | **Total number of studies with each CAS characteristic score** |
| --- | --- | --- | --- | --- |
| **Learning present** | 4 | 6 | 1 | 11 |
| **Learning absent** | 3 | 20 | 12 | 35 |
|  |  |  |  |  |
| **Interconnections present** | 0 | 3 | 0 | 3 |
| **Interconnections absent** | 7 | 26 | 13 | 43 |
|  |  |  |  |  |
| **Self-organization present** | 7 | 21 | 2 | 30 |
| **Self-organization absent** | 0 | 5 | 11 | 16 |
|  |  |  |  |  |
| **Co-evolution present** | 4 | 12 | 0 | 16 |
| **Co-evolution absent** | 3 | 14 | 13 | 30 |
